# Supplementary material for: Targeting CD47 in Anaplastic Thyroid Carcinoma Enhances Tumor Phagocytosis by Macrophages and Is a Promising Therapeutic Strategy
Source: PubMed Central journal article supplement (PMC6648226; doi:10.1089/thy.2018.0555), 2019-07-17
Supplement: Supp_Fig1.pdf [file Supp_Fig1.pdf]

## Supplementary Data

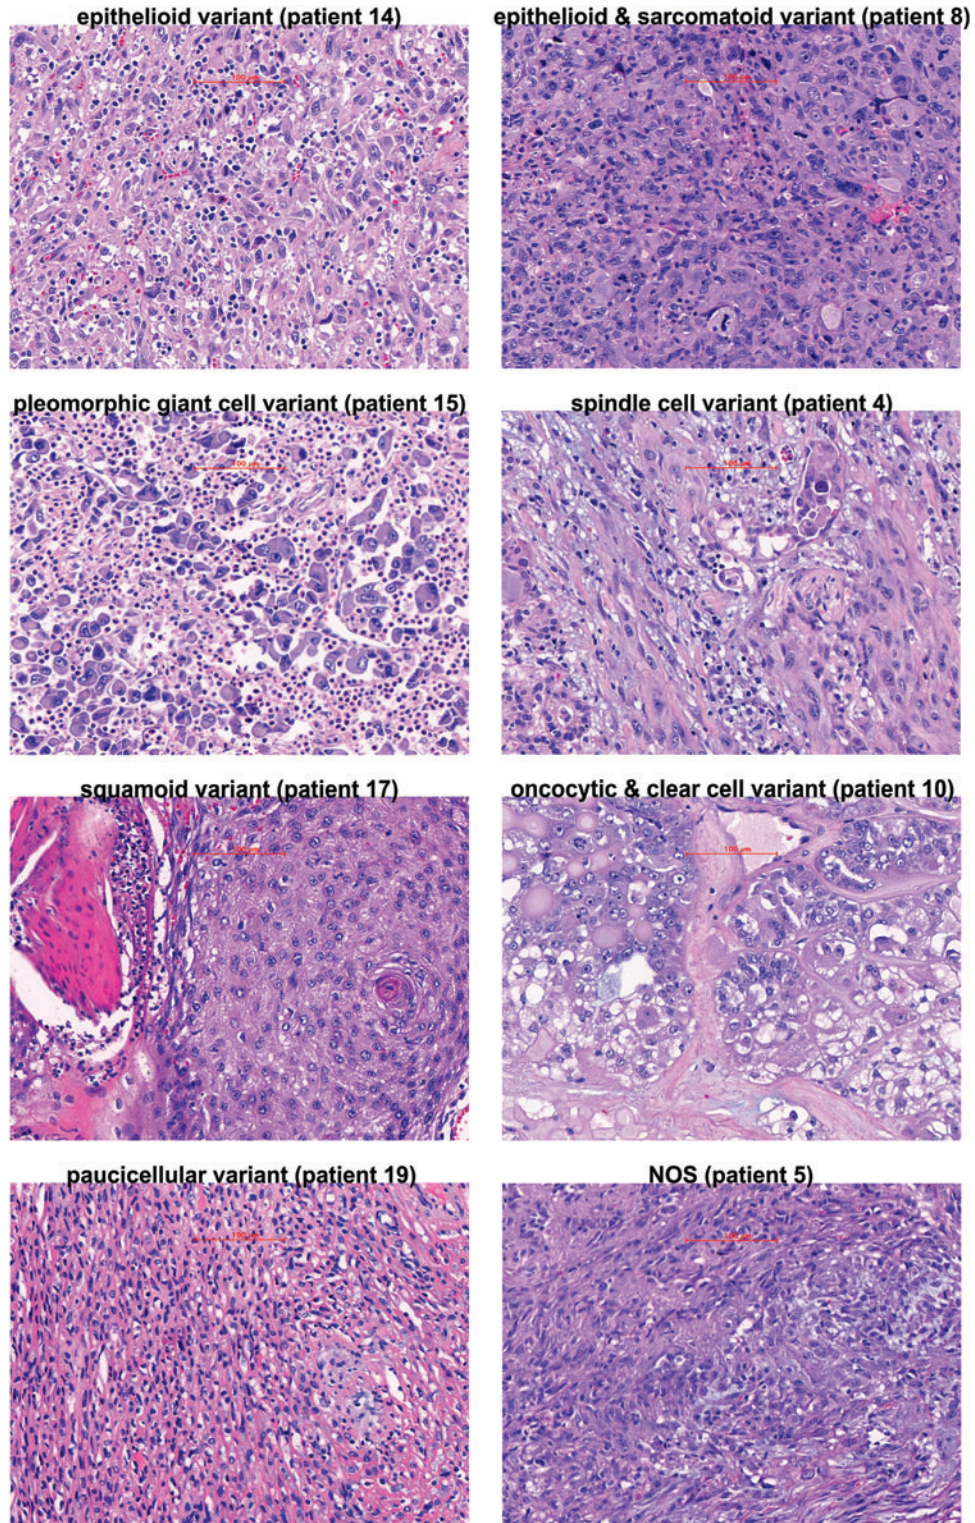

**SUPPLEMENTARY FIG. S1.** Examples of ATC morphological variants. H&E staining of eight representative tumor sections. See also Supplementary Table S1. Scale bars: 100  $\mu$ m.
