# Supplementary material for: Targeting CD47 in Anaplastic Thyroid Carcinoma Enhances Tumor Phagocytosis by Macrophages and Is a Promising Therapeutic Strategy
Source: PubMed Central journal article supplement (PMC6648226; doi:10.1089/thy.2018.0555), 2019-07-17
Supplement: Supp_Fig3.pdf [file Supp_Fig3.pdf]

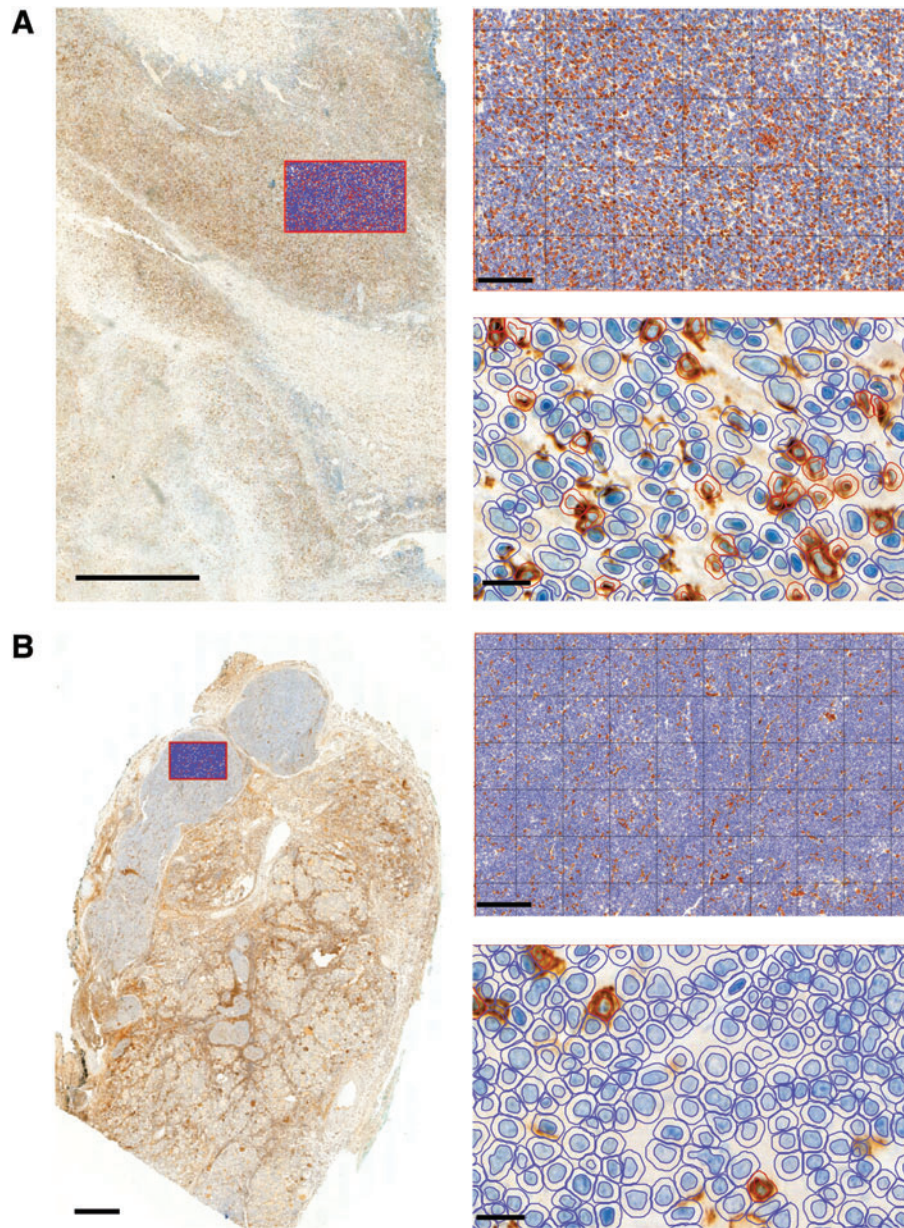

**SUPPLEMENTARY FIG. S3.** Example images of QuPath automated segmentation results. (A) CD68 IHC staining (patient 16) and (B) CD163 IHC staining (patient 3). Scale bars: 2 mm, 200  $\mu\text{m}$ , and 20  $\mu\text{m}$  for the different magnifications, respectively.
