# Supplementary material for: Targeting CD47 in Anaplastic Thyroid Carcinoma Enhances Tumor Phagocytosis by Macrophages and Is a Promising Therapeutic Strategy
Source: PubMed Central journal article supplement (PMC6648226; doi:10.1089/thy.2018.0555), 2019-07-17
Supplement: Supp_Fig4.pdf [file Supp_Fig4.pdf]

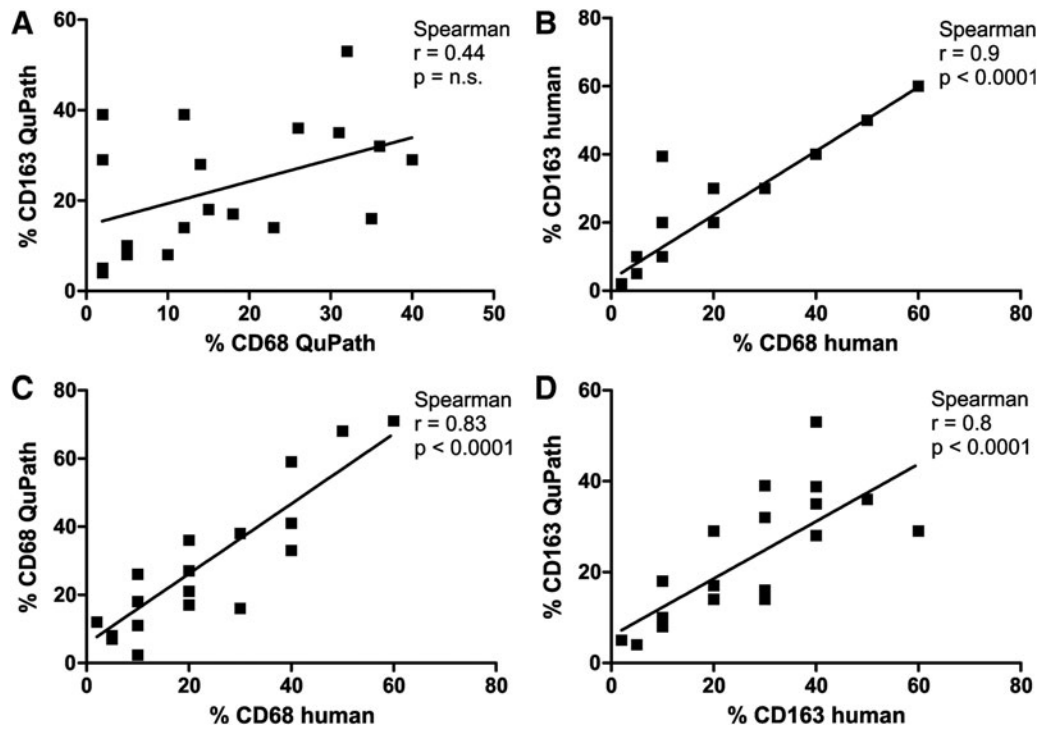

**SUPPLEMENTARY FIG. S4.** CD68 and CD163 expression correlate in ATC tumors. (A and B) Correlation of percentages of CD68<sup>+</sup> and CD163<sup>+</sup> cells as analyzed by (A) QuPath automated segmentation or (B) semi-quantitative analysis by microscopy. (C and D) Correlation of QuPath automated segmentation versus semi-quantitative microscopic analysis for the percentages of (C) CD68<sup>+</sup> cells and (D) CD163<sup>+</sup> cells.
