# Supplementary material for: Targeting CD47 in Anaplastic Thyroid Carcinoma Enhances Tumor Phagocytosis by Macrophages and Is a Promising Therapeutic Strategy
Source: PubMed Central journal article supplement (PMC6648226; doi:10.1089/thy.2018.0555), 2019-07-17
Supplement: Supp_Fig5.pdf [file Supp_Fig5.pdf]

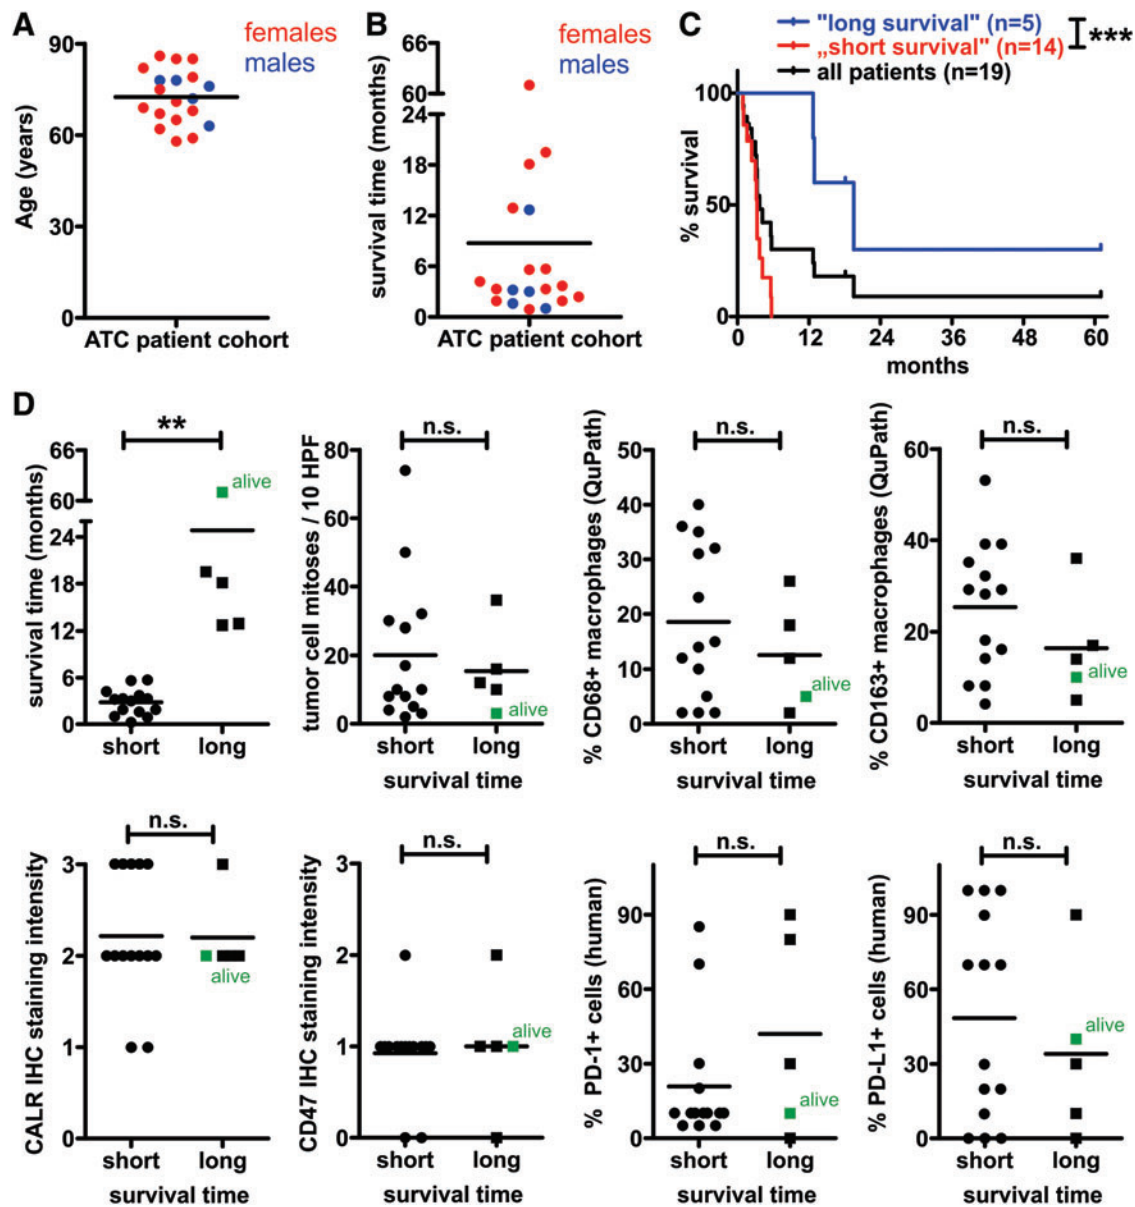

**SUPPLEMENTARY FIG. S5.** Survival subgroups analysis. (A) Age and sex and (B) survival time distribution in the entire ATC cohort. (C) Kaplan–Meier survival curves for all patients and the “short”- versus “long”-surviving patients. (D) Survival time, tumor cell mitoses, CD68<sup>+</sup> macrophages, CD163<sup>+</sup> macrophages, calreticulin staining, CD47 staining, PD-1<sup>+</sup> cells, and PD-L1<sup>+</sup> cells in the two different survival subgroups. Statistics: (C) log-rank test; (D) Mann–Whitney *U*-test. \*\**p* < 0.01; \*\*\**p* < 0.001. n.s., not significant.
