# Supplementary material for: Targeting CD47 in Anaplastic Thyroid Carcinoma Enhances Tumor Phagocytosis by Macrophages and Is a Promising Therapeutic Strategy
Source: PubMed Central journal article supplement (PMC6648226; doi:10.1089/thy.2018.0555), 2019-07-17
Supplement: Supp_Fig6.pdf [file Supp_Fig6.pdf]

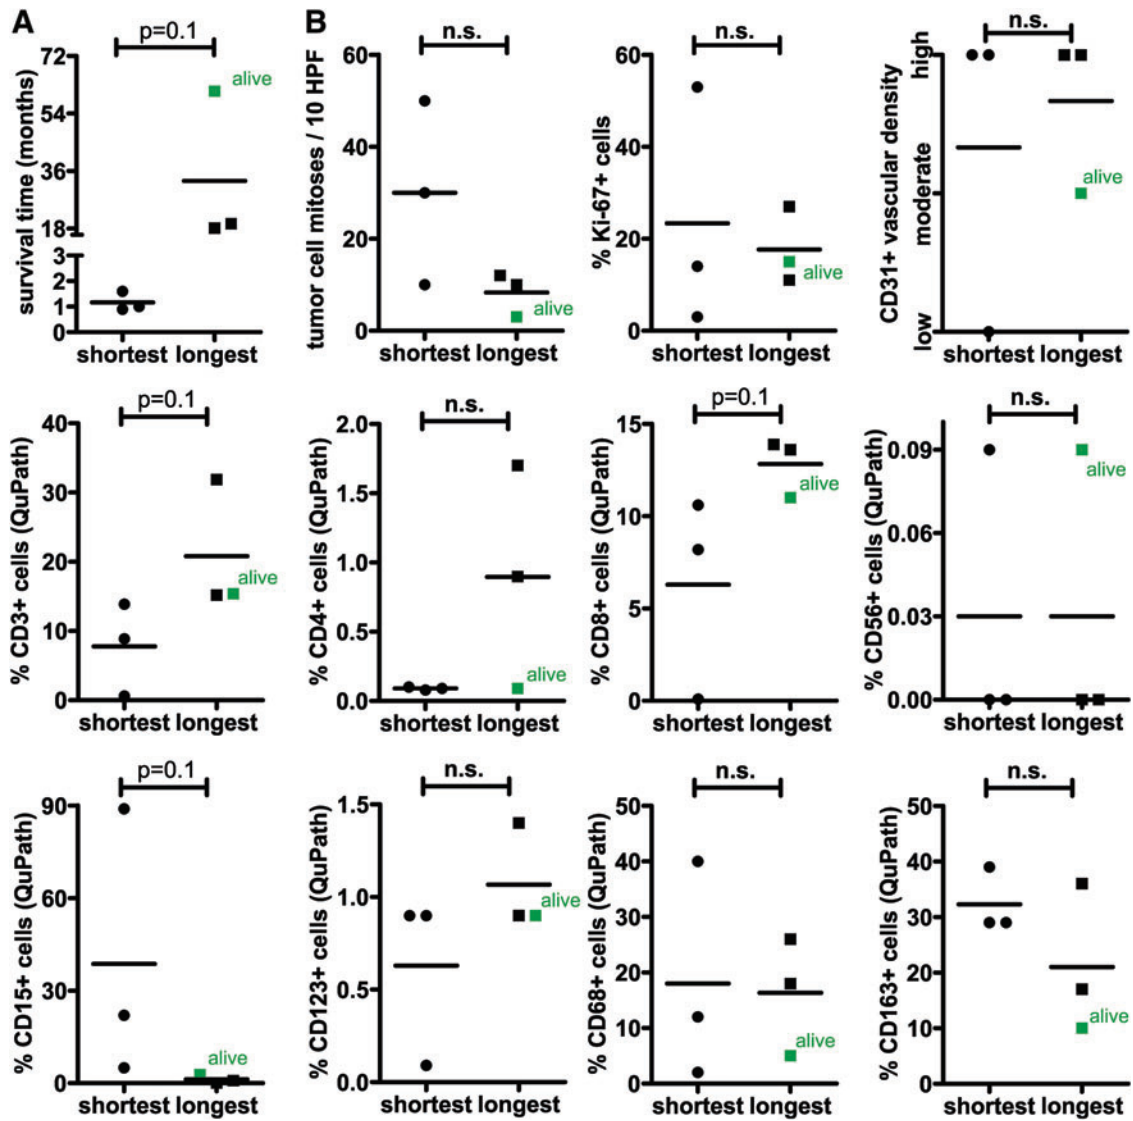

**SUPPLEMENTARY FIG. S6.** In-depth IHC analysis. The immune infiltrate in three most extreme survival outliers of each subgroup was further analyzed. (A) Survival time. (B) Tumor cell mitoses, Ki-67<sup>+</sup> cells, CD31<sup>+</sup> vascular density, CD3<sup>+</sup>, CD4<sup>+</sup>, and CD8<sup>+</sup> T cells, CD56<sup>+</sup> NK cells, CD15<sup>+</sup> granulocytes, CD123<sup>+</sup> plasmacytoid dendritic cells, CD68<sup>+</sup> macrophages, and CD163<sup>+</sup> macrophages in the outliers. Statistics: Mann–Whitney *U*-test. n.s., not significant.
