# Supplementary material for: Targeting CD47 in Anaplastic Thyroid Carcinoma Enhances Tumor Phagocytosis by Macrophages and Is a Promising Therapeutic Strategy
Source: PubMed Central journal article supplement (PMC6648226; doi:10.1089/thy.2018.0555), 2019-07-17
Supplement: Supp_Table2.pdf [file Supp_Table2.pdf]

SUPPLEMENTARY TABLE S2. ANTIBODIES, CLONES, MANUFACTURERS, AND STAINING CONDITIONS FOR IHC

| <i>Antigen</i>                | <i>Reactivity</i> | <i>Host</i> | <i>Clone</i> | <i>Manufacturer</i>       | <i>Dilution</i> | <i>Pretreatment</i>          |
|-------------------------------|-------------------|-------------|--------------|---------------------------|-----------------|------------------------------|
| Calponin                      | Human             | Mouse       | CALP1        | Dako                      | 1:800           | Protease 37°C, 5 min         |
| Calreticulin                  | Human             | Mouse       | FMC75        | Abcam                     | 1:6000          | Citrate buffer 100°C, 30 min |
| CD3                           | Human             | Mouse       | LN10         | Novocastra                | 1:200           | EDTA buffer 100°C, 20 min    |
| CD4                           | Human             | Mouse       | 4B12         | Novocastra                | 1:100           | EDTA buffer 100°C, 30 min    |
| CD8                           | Human             | Mouse       | C8/144B      | Cell Marque               | 1:200           | EDTA buffer 100°C, 20 min    |
| CD15                          | Human             | Mouse       | MMA          | BD Biosciences            | 1:25            | EDTA buffer 95°C, 40 min     |
| CD31                          | Human             | Mouse       | JC/70A       | Dako                      | 1:800           | EDTA buffer 95°C, 30 min     |
| CD47                          | Human             | Mouse       | B6H12        | Santa Cruz                | 1:20            | Tris buffer 95°C, 30 min     |
| CD47                          | Mouse             | Goat        | poly         | R&D Systems               | 1:750           | Tris buffer 95°C, 30 min     |
| CD56                          | Human             | Mouse       | CD564        | Novocastra                | 1:400           | EDTA buffer 100°C, 20 min    |
| CD68                          | Human             | Mouse       | PG-M1        | Dako                      | 1:100           | EDTA buffer 100°C, 30 min    |
| CD68                          | Mouse             | Rat         | FA11         | ABD Serotec               | 1:100           | Citrate buffer 100°C, 30 min |
| CD123                         | Human             | Mouse       | BR4MS        | Novocastra                | 1:100           | EDTA buffer 95°C, 40 min     |
| CD163                         | Human             | Mouse       | 10D6         | Novocastra                | 1:400           | EDTA buffer 95°C, 20 min     |
| F4/80                         | Mouse             | Rat         | A3-1         | ABD Serotec               | 1:50            | Protease 37°C, 5 min         |
| Fibroblast activation protein | Human             | Mouse       | 1E5          | Abcam                     | 1:1500          | Tris buffer 95°C, 30 min     |
| Ki-67                         | Human             | Rabbit      | SP6          | Cell Marque               | 1:100           | EDTA buffer 95°C, 40 min     |
| PD-1                          | Human             | Mouse       | NAT-105      | Cell Marque               | 1:150           | Tris buffer 95°C, 30 min     |
| PD-L1                         | Human             | Rabbit      | E1L3N        | Cell Signaling Technology | 1:400           | Tris buffer 95°C, 40 min     |
| Smooth muscle actin           | Human             | Mouse       | 1A4          | Sigma                     | 1:8000          | —                            |
| Vimentin                      | Human             | Mouse       | 3B4          | Dako                      | 1:1600          | EDTA buffer 95°C, 20 min     |
