# Supplementary material for: Targeting CD47 in Anaplastic Thyroid Carcinoma Enhances Tumor Phagocytosis by Macrophages and Is a Promising Therapeutic Strategy
Source: PubMed Central journal article supplement (PMC6648226; doi:10.1089/thy.2018.0555), 2019-07-17
Supplement: Supp_Table3.pdf [file Supp_Table3.pdf]

SUPPLEMENTARY TABLE S3. ANTIBODIES, CLONES, MANUFACTURERS, AND STAINING CONDITIONS FOR FACS

| <i>Antigen</i>  | <i>Reactivity</i> | <i>Host</i> | <i>Clone</i> | <i>Manufacturer</i> | <i>Dilution</i> | <i>Conjugate</i> |
|-----------------|-------------------|-------------|--------------|---------------------|-----------------|------------------|
| CD4             | Mouse             | Rat         | RM4-5        | BioLegend           | 1:1000          | APC-Cy7          |
| CD8a            | Mouse             | Rat         | 53-6.7       | BioLegend           | 1:200           | FITC             |
| CD11b           | Mouse/human       | Rat         | M1/70        | BioLegend           | 1:400           | Pacific Blue     |
| CD14            | Human             | Mouse       | M5E2         | BioLegend           | 1:20            | APC              |
| CD45            | Human             | Mouse       | HI30         | BioLegend           | 1:50            | Pacific Blue     |
| CD45            | Mouse             | Rat         | 30-F11       | BioLegend           | 1:200           | Alexa Fluor 700  |
| CD47            | Human             | Mouse       | CC2C6        | BioLegend           | 1:10            | FITC             |
| isotype control | Unknown           | Mouse       | P3.6.2.8.1   | eBioscience         | 1:10            | FITC             |
| CD47            | Human             | Mouse       | B6H12        | eBioscience         | 1:20            | APC              |
| isotype control | Unknown           | Mouse       | P3.6.2.8.1   | eBioscience         | 1:20            | APC              |
| Calreticulin    | Human             | Mouse       | FMC75        | Abcam               | 1:50            | PE               |
| isotype control | Unknown           | Mouse       | B11/6        | Abcam               | 1:1.25          | PE               |
| CD68            | Human             | Mouse       | Y1/82A       | BD Biosciences      | 1:20            | PE               |
| Mouse Ig        | Mouse             | Goat        | polyclonal   | BD Biosciences      | 1:200           | PE               |
| CD80            | Mouse             | Rat         | 16-10A1      | BioLegend           | 1:100           | PerCP-Cy5.5      |
| CD326 (EpCAM)   | Mouse             | Rat         | G8.8         | BioLegend           | 1:1000          | PE-Cy7           |
| F4/80           | Mouse             | Rat         | BM8          | eBioscience         | 1:400           | APC              |
